# Supplementary material for: Relation between Established Glioma Risk Variants and DNA Methylation in the Tumor
Source: PubMed Central journal article supplement (PMC5079592; doi:10.1371/journal.pone.0163067), 2016-10-25
Supplement: pone.0163067.s001.pdf [file pone.0163067.s001.pdf]

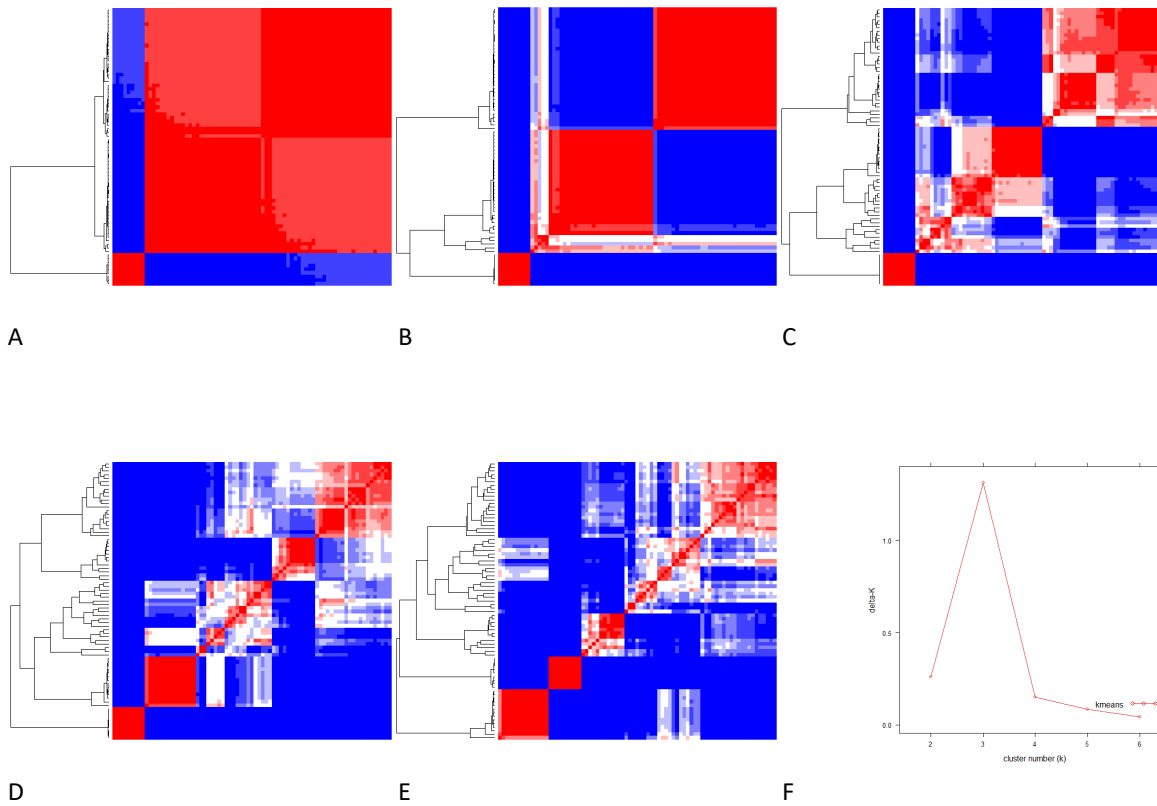

**S1 Figure. Consensus clustering.** Consensus clustering performed on the 8000 most variable CpG probes using the k-means algorithm in 1000 repetitions on 80% of individuals. (A-E) Consensus matrices for  $k=2-6$ , illustrating the number of times two individuals cluster together on a scale from blue (rarely) to red (the majority of times). (F) Delta-k plot indicating that, based on DNA methylation in the 8000 most variable CpG probes, tumors can be divided into three distinct subgroups.
