# Supplementary material for: Relation between Established Glioma Risk Variants and DNA Methylation in the Tumor
Source: PubMed Central journal article supplement (PMC5079592; doi:10.1371/journal.pone.0163067), 2016-10-25
Supplement: pone.0163067.s002.pdf [file pone.0163067.s002.pdf]

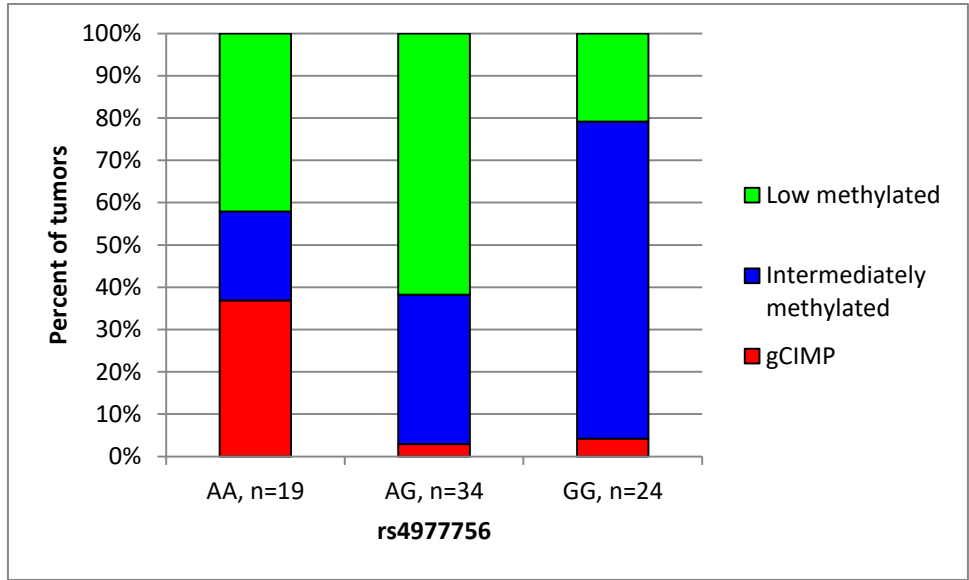

A

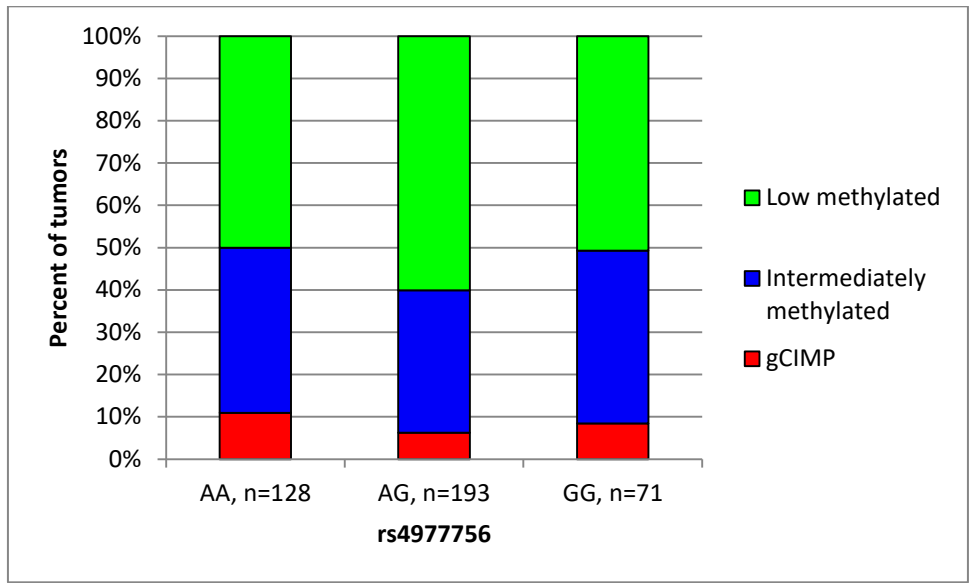

B

**S2 Figure. Association between rs4977756 and DNA methylation pattern of the tumor.** Distribution of DNA methylation patterns between genotypes in (A) 77 glioma tumors, and (B) 392 TCGA glioblastoma tumors.  $P_{AA \text{ vs. } AG/GG} = 4.41 \times 10^{-4}$  and 0.23 in (A) and (B), respectively.
