# Supplementary material for: Relation between Established Glioma Risk Variants and DNA Methylation in the Tumor
Source: PubMed Central journal article supplement (PMC5079592; doi:10.1371/journal.pone.0163067), 2016-10-25
Supplement: pone.0163067.s003.pdf [file pone.0163067.s003.pdf]

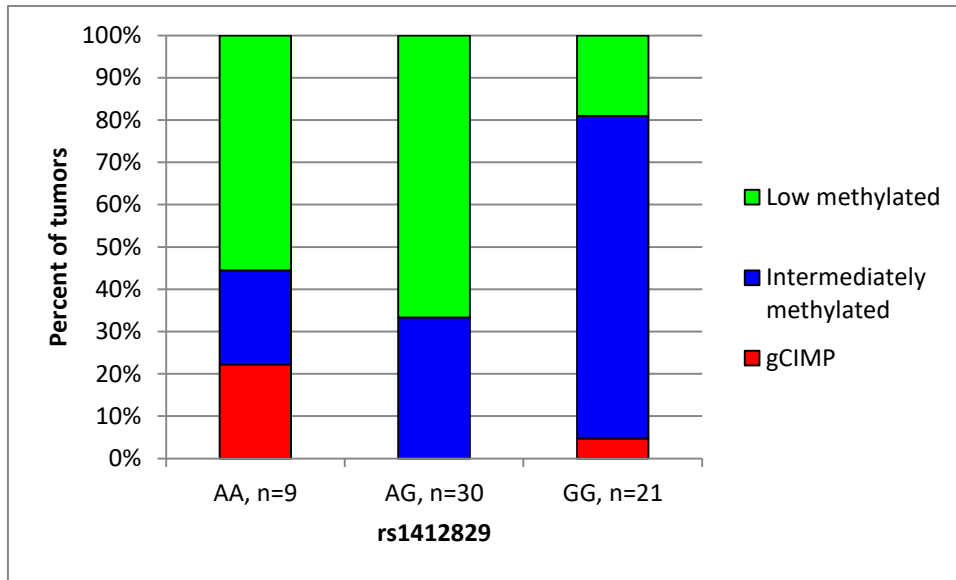

**A**

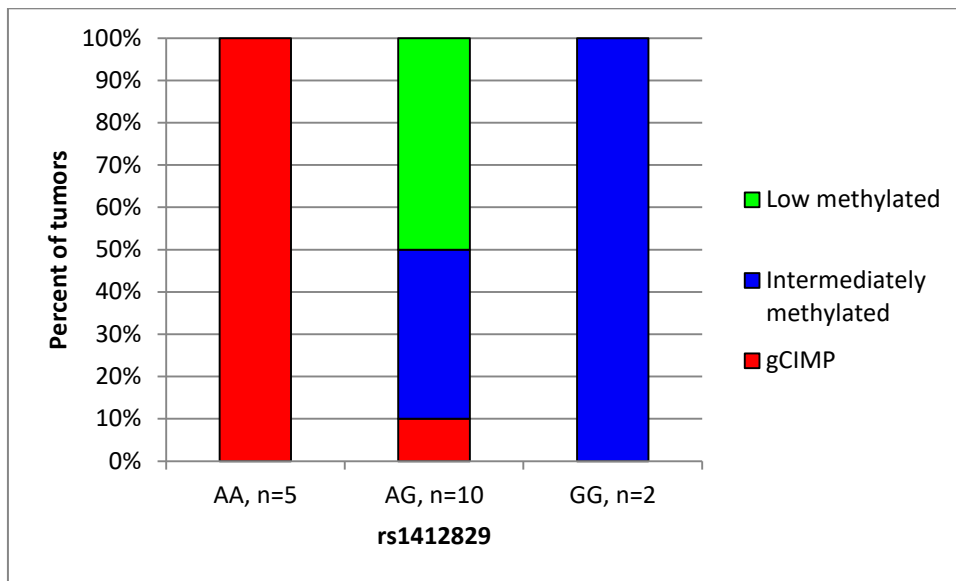

**B**

**S3 Figure. Association between rs1412829 and DNA methylation pattern in glioblastoma and non-glioblastoma.** (A) Glioblastoma (n=60) and (B) non-glioblastoma (lower grade astrocytoma and oligodendroglioma; n=17) tumors in the pilot dataset.
